# Supplementary material
Source: publisher figshare collection journal article supplement (https://frontiersin.figshare.com/ndownloader/files/26060696)
Supplement: Supplementary file [file 26060696]

# Supplementary Material

## Supplementary Figures

Suppl. Fig. 1

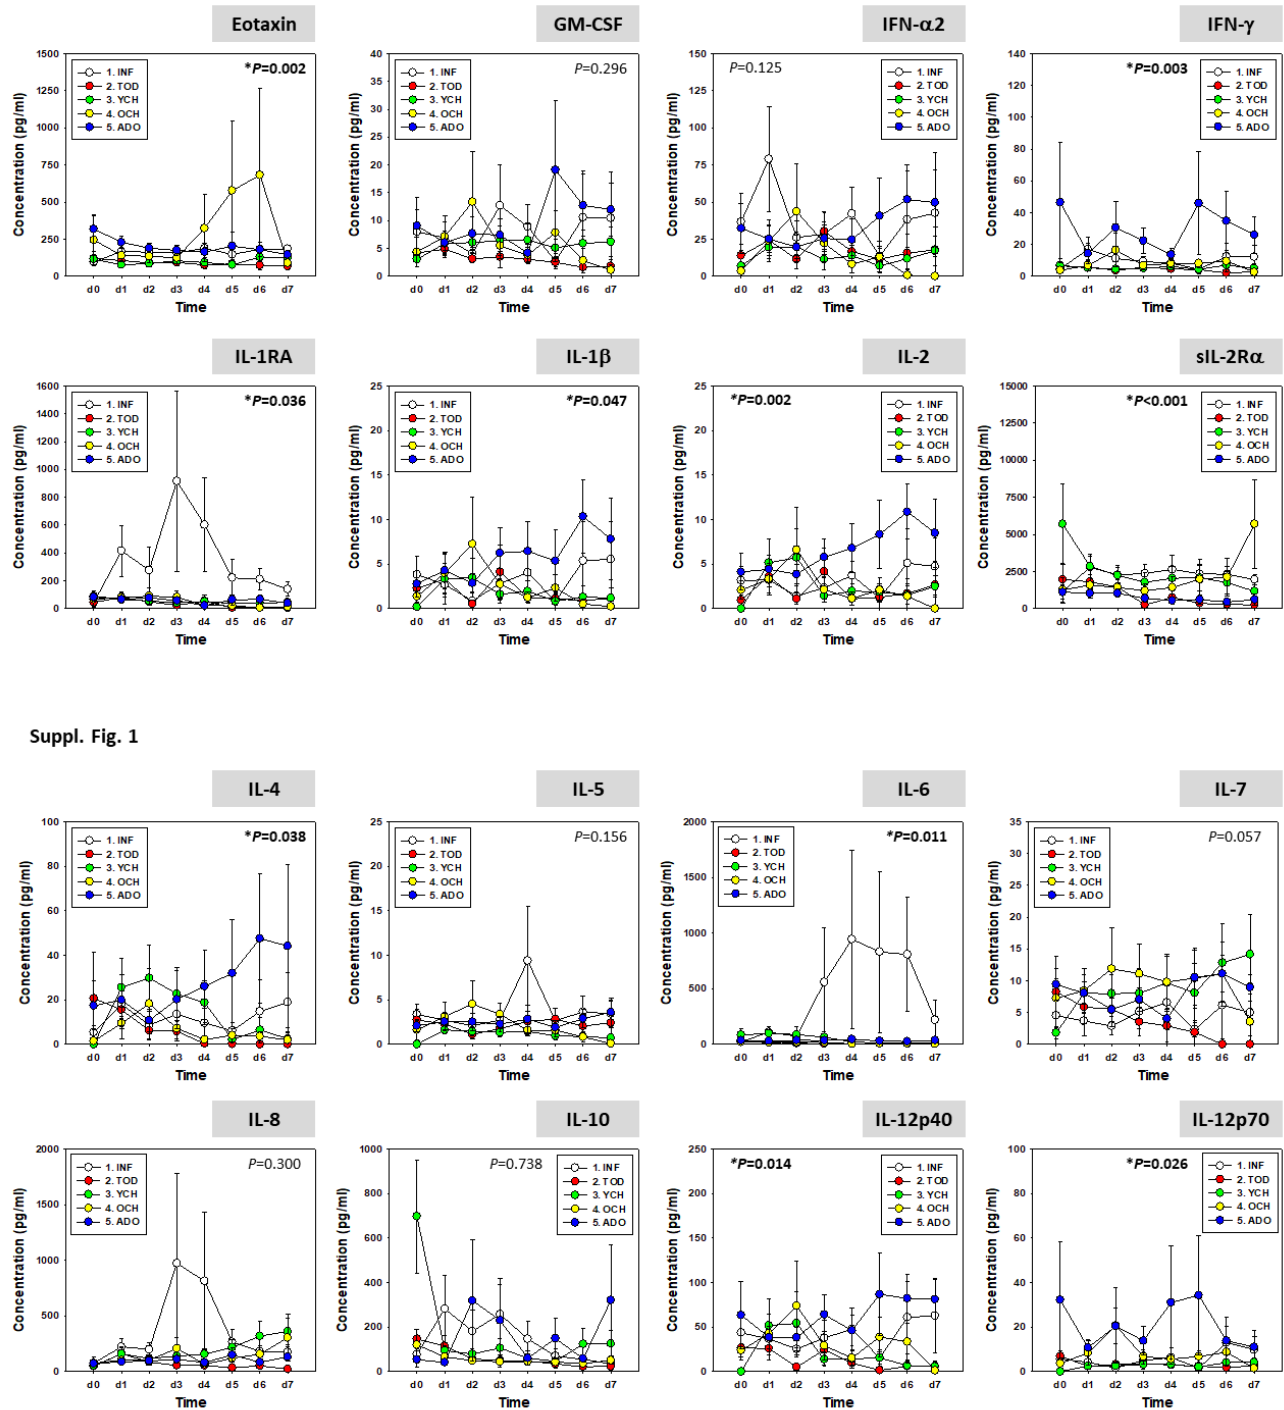

Suppl. Fig. 1

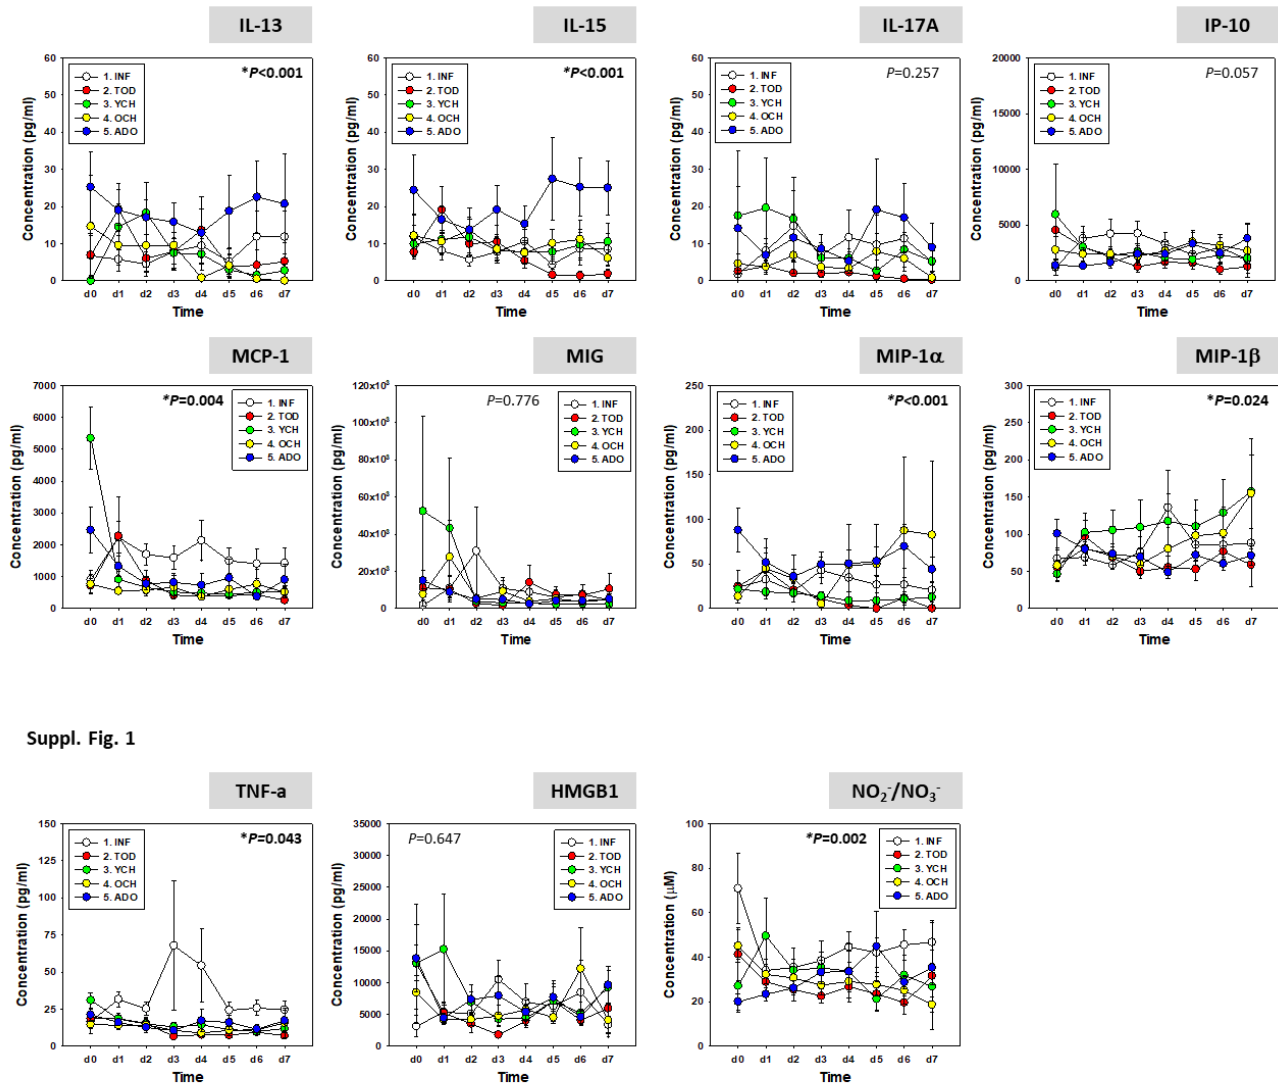

Suppl. Fig. 1

**Supplementary Figure 1. Time-dependent release of inflammatory mediators in PALF patients.** Serum samples from PALF survivors were assessed for a number of inflammatory mediators and segregated into five sub-groups (INF, TOD, YCH, OCH, and ADO) based on age as described in *Materials and Methods*. Results are presented as the mean  $\pm$  SEM (significance level set at \*P<0.05, analyzed by Two-Way ANOVA followed by Holm-Sidak post hoc test).

Suppl. Fig. 2

| Mediator-AUC                       | INF      | TOD      | YCH      | OCH      | ADO      | Total AUC |
|------------------------------------|----------|----------|----------|----------|----------|-----------|
| MIG                                | 78235.88 | 53646.94 | 84664.61 | 61256.55 | 39300.04 | 317104.02 |
| HMG81                              | 45889.44 | 35230.60 | 54306.82 | 41878.54 | 49000.44 | 226305.84 |
| IP-10                              | 22431.98 | 13571.98 | 18058.30 | 19040.11 | 16125.67 | 89228.05  |
| sIL-2Ra                            | 16276.65 | 5997.24  | 16160.31 | 13196.59 | 5176.81  | 56807.60  |
| MCP-1                              | 11702.17 | 5290.15  | 6453.53  | 4149.64  | 6656.05  | 34251.55  |
| IL-8                               | 2777.55  | 473.04   | 1312.32  | 942.83   | 705.00   | 6210.73   |
| Eotaxin                            | 1144.13  | 613.74   | 684.30   | 2147.70  | 1368.99  | 5958.86   |
| IL-6                               | 3439.11  | 78.21    | 335.27   | 81.78    | 235.19   | 4169.56   |
| IL-1ra                             | 2731.57  | 247.59   | 356.35   | 338.52   | 410.93   | 4084.97   |
| IL-10                              | 1046.53  | 406.68   | 919.55   | 367.37   | 1043.23  | 3783.36   |
| MIP-1b                             | 587.22   | 455.77   | 774.98   | 596.26   | 488.27   | 2902.50   |
| IL-12p40                           | 276.35   | 88.28    | 158.33   | 245.49   | 427.38   | 1195.82   |
| NO <sub>2</sub> /NO <sub>3</sub> - | 298.89   | 183.13   | 232.66   | 203.94   | 217.51   | 1136.12   |
| MIP-1a                             | 204.40   | 102.21   | 94.78    | 316.49   | 375.43   | 1093.31   |
| IFN- $\alpha$ 2                    | 266.89   | 125.49   | 95.24    | 113.53   | 228.15   | 829.30    |
| TNF- $\alpha$                      | 249.53   | 78.00    | 103.28   | 84.80    | 103.05   | 618.66    |
| IL-4                               | 82.72    | 38.33    | 106.42   | 46.30    | 186.97   | 460.73    |
| IFN $\gamma$                       | 70.64    | 30.59    | 38.14    | 58.87    | 197.65   | 395.89    |
| IL-15                              | 55.38    | 52.57    | 66.41    | 70.54    | 141.81   | 386.71    |
| IL-13                              | 53.92    | 60.73    | 53.05    | 41.18    | 128.88   | 337.76    |
| IL-12p70                           | 39.36    | 21.07    | 19.62    | 59.31    | 145.59   | 284.96    |
| IL-17A                             | 65.95    | 13.30    | 70.79    | 34.18    | 79.88    | 264.09    |
| IL-7                               | 31.47    | 23.81    | 62.52    | 68.06    | 55.35    | 241.22    |
| GM-CSF                             | 55.07    | 21.60    | 40.45    | 43.14    | 67.63    | 227.89    |
| IL-2                               | 20.91    | 14.73    | 18.89    | 17.67    | 46.35    | 118.57    |
| IL-1b                              | 21.28    | 12.94    | 13.17    | 18.79    | 40.82    | 107.00    |
| IL-5                               | 26.57    | 15.17    | 8.01     | 15.83    | 17.76    | 83.34     |

| Total No. Connections/mediator     | INF | TOD | YCH | OCH | ADO | Total No. Connections |
|------------------------------------|-----|-----|-----|-----|-----|-----------------------|
| IL-1 $\beta$                       | 22  | 3   | 2   | 33  | 1   | 61                    |
| IL-12p70                           | 17  | 5   | 1   | 29  | 3   | 55                    |
| GM-CSF                             | 16  | 7   | 0   | 27  | 4   | 54                    |
| IFN- $\alpha$ 2                    | 16  | 6   | 1   | 30  | 1   | 54                    |
| IL-2                               | 19  | 7   | 2   | 25  | 0   | 53                    |
| IFN $\gamma$                       | 15  | 1   | 1   | 27  | 8   | 52                    |
| IL-12p40                           | 17  | 5   | 4   | 23  | 0   | 49                    |
| IL-4                               | 5   | 0   | 1   | 25  | 2   | 33                    |
| IL-13                              | 0   | 11  | 1   | 6   | 2   | 20                    |
| IL-17A                             | 0   | 1   | 0   | 16  | 3   | 20                    |
| IL-5                               | 0   | 4   | 0   | 14  | 0   | 18                    |
| IL-15                              | 7   | 7   | 1   | 1   | 0   | 16                    |
| IL-7                               | 16  | 0   | 0   | 0   | 0   | 16                    |
| IL-1RA                             | 3   | 3   | 0   | 7   | 2   | 15                    |
| MIG                                | 0   | 10  | 0   | 2   | 0   | 12                    |
| IL-10                              | 3   | 5   | 0   | 0   | 2   | 10                    |
| Eotaxin                            | 0   | 5   | 0   | 3   | 0   | 8                     |
| MCP-1                              | 0   | 3   | 0   | 3   | 2   | 8                     |
| TNF- $\alpha$                      | 6   | 2   | 0   | 0   | 0   | 8                     |
| IL-8                               | 4   | 3   | 0   | 0   | 0   | 7                     |
| IP-10                              | 0   | 7   | 0   | 0   | 0   | 7                     |
| MIP-1 $\beta$                      | 0   | 4   | 0   | 0   | 0   | 4                     |
| NO <sub>2</sub> /NO <sub>3</sub> - | 0   | 1   | 0   | 3   | 0   | 4                     |
| IL-6                               | 2   | 0   | 0   | 1   | 0   | 3                     |
| MIP-1 $\alpha$                     | 0   | 2   | 0   | 1   | 0   | 3                     |
| sIL-2R $\alpha$                    | 0   | 3   | 0   | 0   | 0   | 3                     |
| HMG81                              | 0   | 1   | 0   | 0   | 0   | 1                     |

stringency level 0.95

**Supplementary Figure 2.** AUCs from the time courses of inflammatory mediators in five PALF subgroups (INF, TOD, YCH, OCH, and ADO) and total number of connections (N) from DyNA (stringency level 0.95) for each inflammatory mediator (i) as described in *Materials and Methods*.

Suppl. Fig. 3

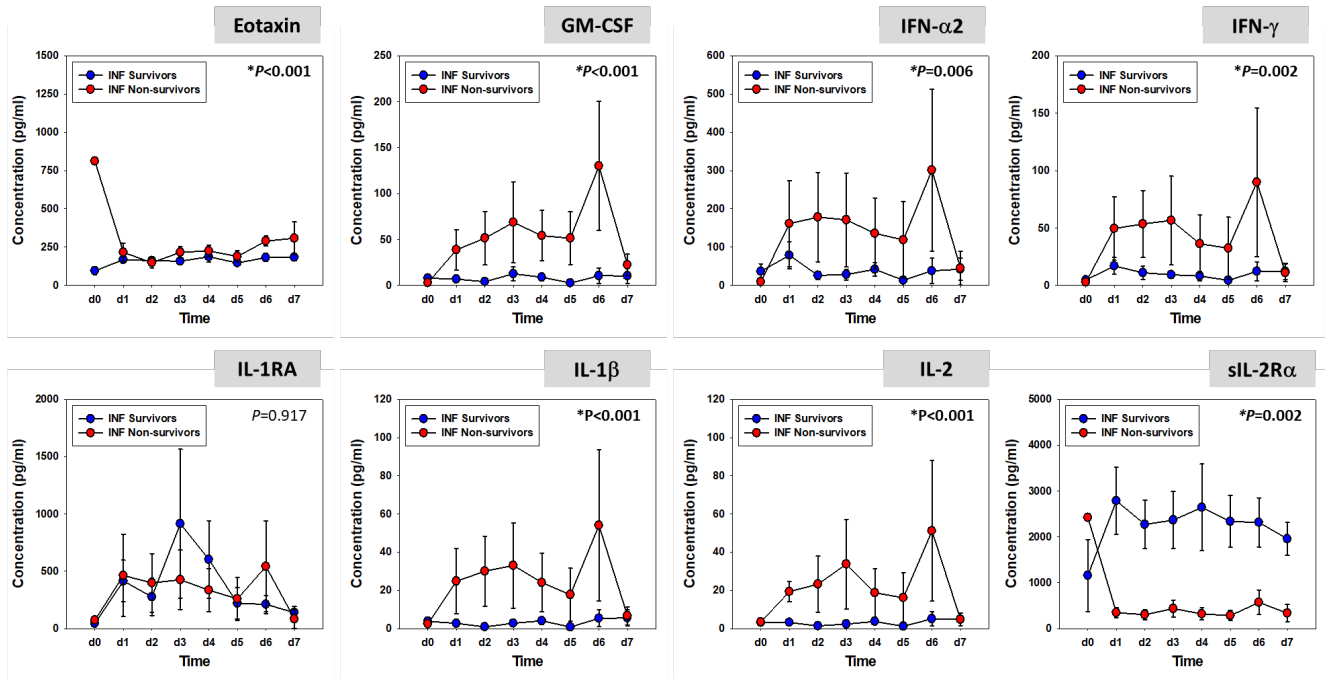

Suppl. Fig. 3

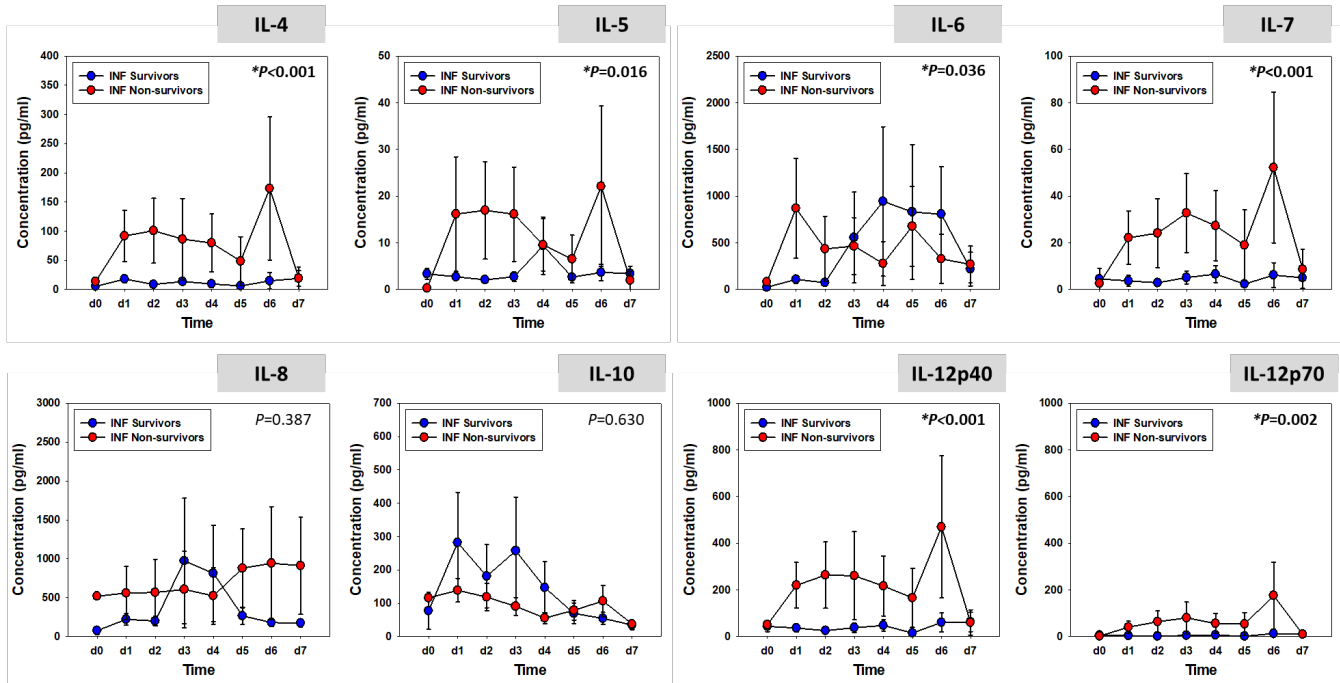

Suppl. Fig. 3

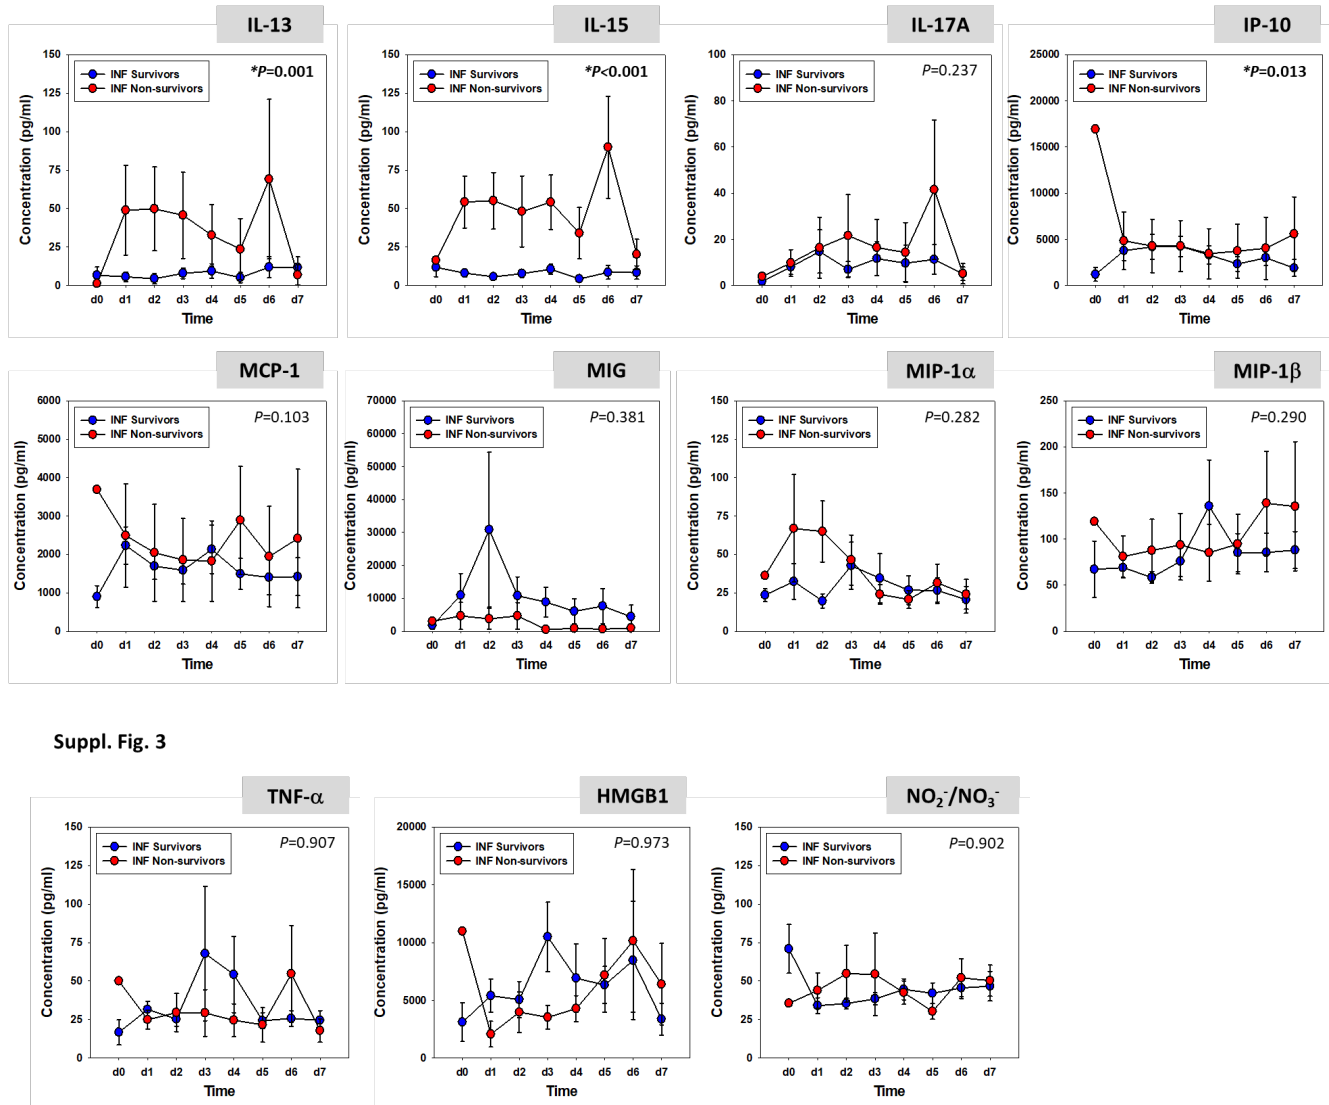

**Supplementary Figure 3. Time-dependent release of inflammatory mediators in PALF patients.** Serum samples from both INF survivors and non-survivors (NS) were assessed for a number of inflammatory mediators as described in *Materials and Methods*. Results are presented as the mean  $\pm$  SEM (significance level set at \*P<0.05, analyzed by Two-Way ANOVA followed by Holm-Sidak post hoc test).

Suppl. Fig. 4

| INF             | d0-d1 | d1-d2 | d2-d3 | d3-d4 | d4-d5 | d5-d6 | d6-d7 | Total |
|-----------------|-------|-------|-------|-------|-------|-------|-------|-------|
| IL-1b           | 1     | 0     | 1     | 3     | 1     | 8     | 8     | 22    |
| IL-2            | 0     | 0     | 1     | 2     | 1     | 7     | 8     | 19    |
| IL-12p40        | 0     | 0     | 0     | 2     | 0     | 7     | 8     | 17    |
| IL-12p70        | 1     | 0     | 0     | 1     | 0     | 8     | 7     | 17    |
| GM-CSF          | 0     | 0     | 0     | 0     | 0     | 8     | 8     | 16    |
| IFN- $\alpha$ 2 | 0     | 0     | 0     | 0     | 0     | 8     | 8     | 16    |
| IL-7            | 0     | 0     | 0     | 0     | 0     | 8     | 8     | 16    |
| IFN $\gamma$    | 0     | 0     | 0     | 0     | 0     | 7     | 8     | 15    |
| IL-15           | 0     | 0     | 0     | 0     | 0     | 0     | 7     | 7     |
| TNF- $\alpha$   | 0     | 0     | 3     | 2     | 1     | 0     | 0     | 6     |
| IL-4            | 0     | 0     | 0     | 0     | 0     | 5     | 0     | 5     |
| IL-8            | 0     | 0     | 2     | 1     | 1     | 0     | 0     | 4     |
| IL-1ra          | 0     | 0     | 2     | 1     | 0     | 0     | 0     | 3     |
| IL-10           | 0     | 0     | 1     | 2     | 0     | 0     | 0     | 3     |
| IL-6            | 0     | 0     | 2     | 0     | 0     | 0     | 0     | 2     |
| Eotaxin         | 0     | 0     | 0     | 0     | 0     | 0     | 0     | 0     |
| sIL-2Ra         | 0     | 0     | 0     | 0     | 0     | 0     | 0     | 0     |
| IL-5            | 0     | 0     | 0     | 0     | 0     | 0     | 0     | 0     |
| IL-13           | 0     | 0     | 0     | 0     | 0     | 0     | 0     | 0     |
| IL-17A          | 0     | 0     | 0     | 0     | 0     | 0     | 0     | 0     |
| IP-10           | 0     | 0     | 0     | 0     | 0     | 0     | 0     | 0     |
| MCP-1           | 0     | 0     | 0     | 0     | 0     | 0     | 0     | 0     |
| MIG             | 0     | 0     | 0     | 0     | 0     | 0     | 0     | 0     |
| MIP-1a          | 0     | 0     | 0     | 0     | 0     | 0     | 0     | 0     |
| MIP-1b          | 0     | 0     | 0     | 0     | 0     | 0     | 0     | 0     |
| HMGB1           | 0     | 0     | 0     | 0     | 0     | 0     | 0     | 0     |
| NO2-/NO3-       | 0     | 0     | 0     | 0     | 0     | 0     | 0     | 0     |

  

| NS              | d0-d1 | d1-d2 | d2-d3 | d3-d4 | d4-d5 | d5-d6 | d6-d7 | Total |
|-----------------|-------|-------|-------|-------|-------|-------|-------|-------|
| IL-1b           | 8     | 6     | 8     | 11    | 12    | 12    | 13    | 70    |
| IFN- $\alpha$ 2 | 8     | 6     | 8     | 10    | 12    | 13    | 12    | 69    |
| IL-13           | 6     | 5     | 6     | 11    | 12    | 12    | 13    | 65    |
| IL-4            | 6     | 5     | 7     | 10    | 10    | 12    | 13    | 63    |
| IL-12p40        | 3     | 4     | 9     | 10    | 12    | 12    | 13    | 63    |
| IL-12p70        | 5     | 4     | 7     | 9     | 10    | 12    | 13    | 60    |
| IFN $\gamma$    | 4     | 2     | 7     | 9     | 10    | 12    | 13    | 57    |
| IL-17A          | 0     | 2     | 7     | 10    | 11    | 13    | 13    | 56    |
| IL-1ra          | 7     | 4     | 4     | 5     | 9     | 13    | 13    | 55    |
| IL-7            | 2     | 3     | 6     | 8     | 12    | 12    | 12    | 55    |
| IL-5            | 6     | 4     | 4     | 3     | 7     | 12    | 13    | 49    |
| TNF- $\alpha$   | 0     | 1     | 3     | 9     | 11    | 12    | 13    | 49    |
| IL-2            | 0     | 1     | 3     | 5     | 12    | 12    | 13    | 46    |
| GM-CSF          | 7     | 3     | 3     | 0     | 0     | 0     | 0     | 13    |
| IL-8            | 0     | 2     | 3     | 3     | 1     | 0     | 2     | 11    |
| IL-10           | 0     | 0     | 0     | 0     | 0     | 0     | 11    | 11    |
| IP-10           | 0     | 2     | 3     | 3     | 0     | 0     | 3     | 11    |
| IL-6            | 0     | 1     | 2     | 2     | 0     | 0     | 2     | 7     |
| MCP-1           | 0     | 1     | 2     | 2     | 1     | 0     | 1     | 7     |
| MIP-1b          | 0     | 0     | 0     | 0     | 0     | 3     | 0     | 3     |
| MIG             | 0     | 0     | 1     | 0     | 0     | 0     | 0     | 1     |
| NO2-/NO3-       | 0     | 0     | 1     | 0     | 0     | 0     | 0     | 1     |
| Eotaxin         | 0     | 0     | 0     | 0     | 0     | 0     | 0     | 0     |
| sIL-2Ra         | 0     | 0     | 0     | 0     | 0     | 0     | 0     | 0     |
| IL-15           | 0     | 0     | 0     | 0     | 0     | 0     | 0     | 0     |
| MIP-1a          | 0     | 0     | 0     | 0     | 0     | 0     | 0     | 0     |
| HMGB1           | 0     | 0     | 0     | 0     | 0     | 0     | 0     | 0     |

stringency level 0.95

**Supplementary Figure 4.** Total number of connections (N) from DyNA (stringency level 0.95) for each inflammatory mediator in PALF (INF vs. INF-NS).
